# Supplementary material for: Aqueous Extracts of Morus alba Root Bark and Cornus officinalis Fruit Protect against Osteoarthritis Symptoms in Testosterone-Deficient and Osteoarthritis-Induced Rats
Source: MDPI journal article supplement (doi:10.3390/pharmaceutics12121245), 2020-12-21
Supplement: s1 [file s1]

Article

# Supplementary Materials: Aqueous Extracts of *Morus alba* Root Bark and *Cornus officinalis* Fruit Protect against Osteoarthritis Symptoms in Testosterone-Deficient and Osteoarthritis-Induced Rats

Sunmin Park, Bo Reum Moon, Ji Eun Kim, Hyun Joo Kim and Ting Zhang

## A Kuwanon Morusin

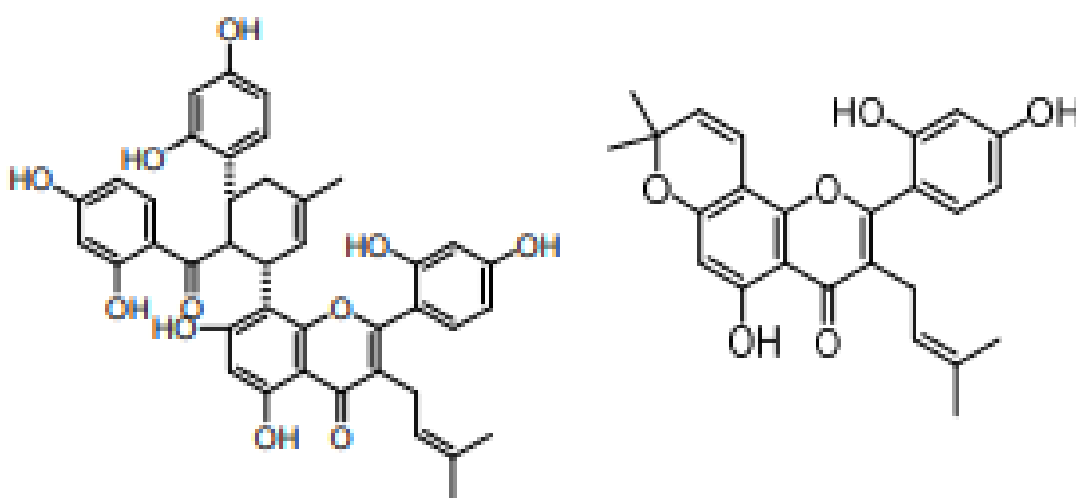

B

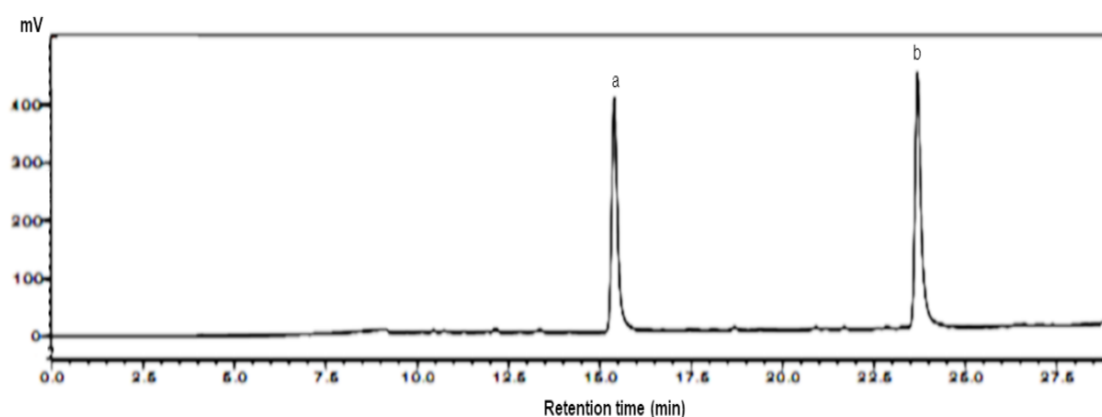

C

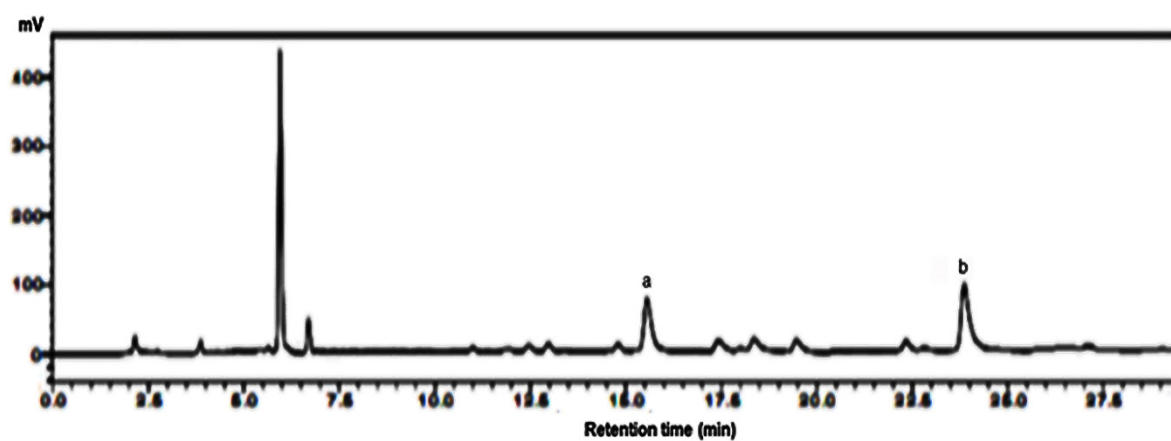

D Gallic acid Morroniside Loganin

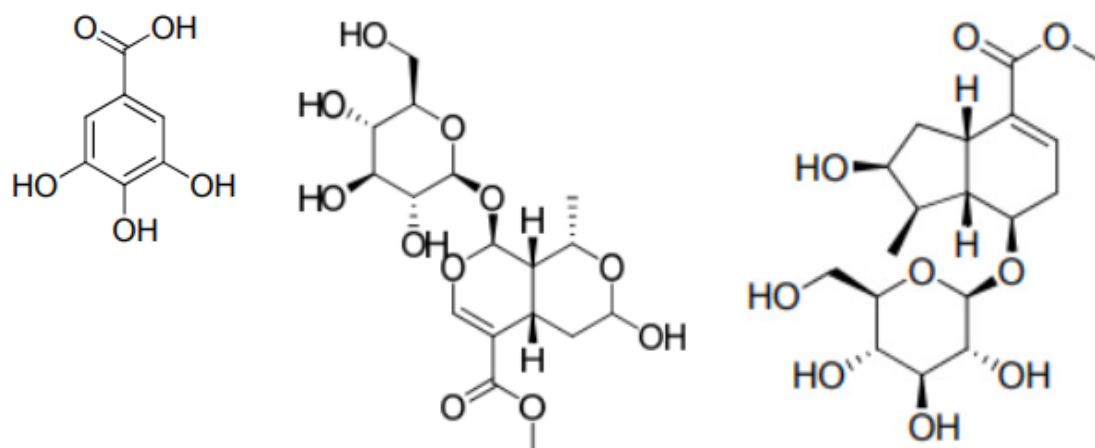

E

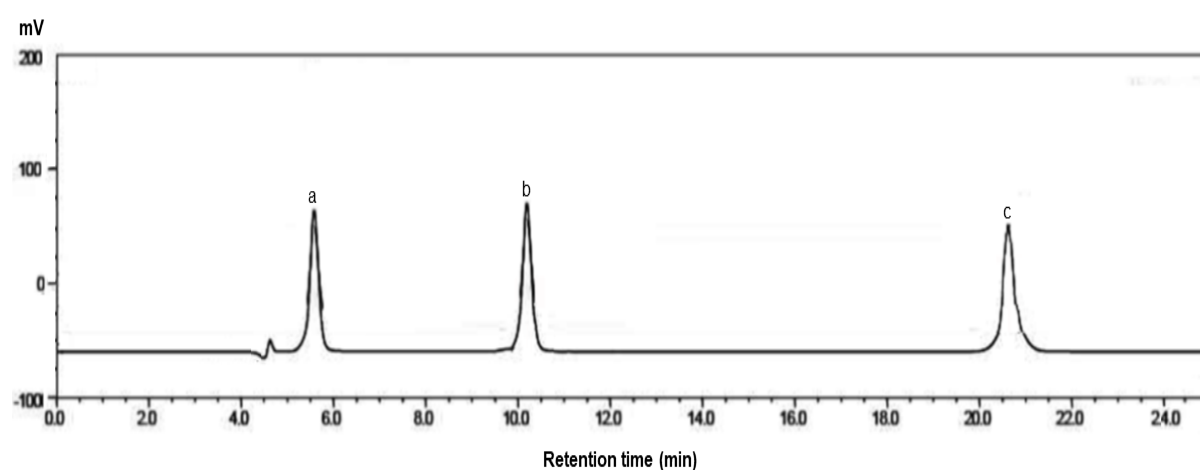

F

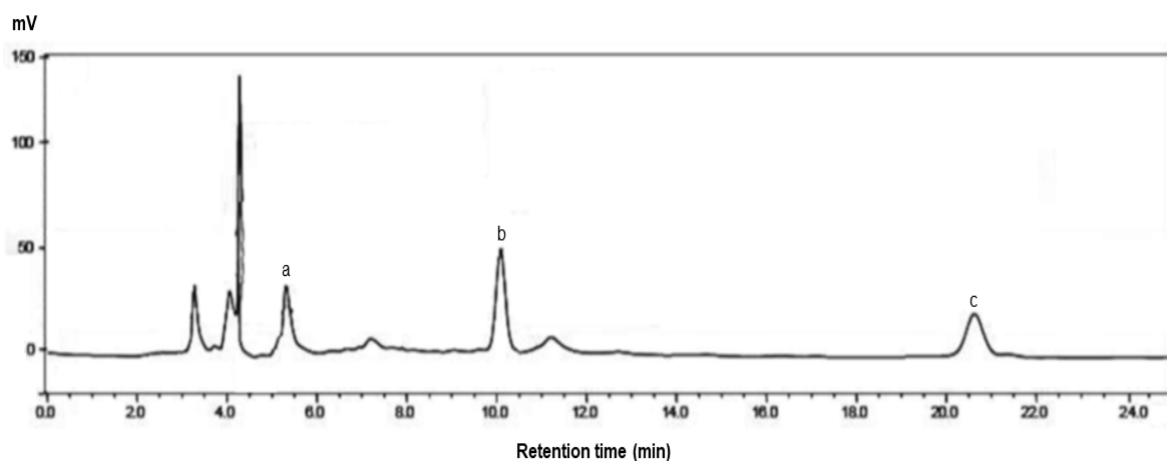

**Figure S1.** HPLC chromatogram of water extracts of *Morus alba* L. root bark and *Cornus officinalis* Siebold & Zucc fruits. (A) Chemical structure of kuwanon and morusin; (B) HPLC chromatogram of kuwanon and morusin standards; (C) HPLC chromatogram of water extracts of *Morus alba* L. root bark; (D) Chemical structure of gallic acid, morroniside, and loganin; (E) HPLC chromatogram of gallic acid, morroniside, and loganin; (F) HPLC chromatogram of *Cornus officinalis* Siebold & Zucc fruit.

A.

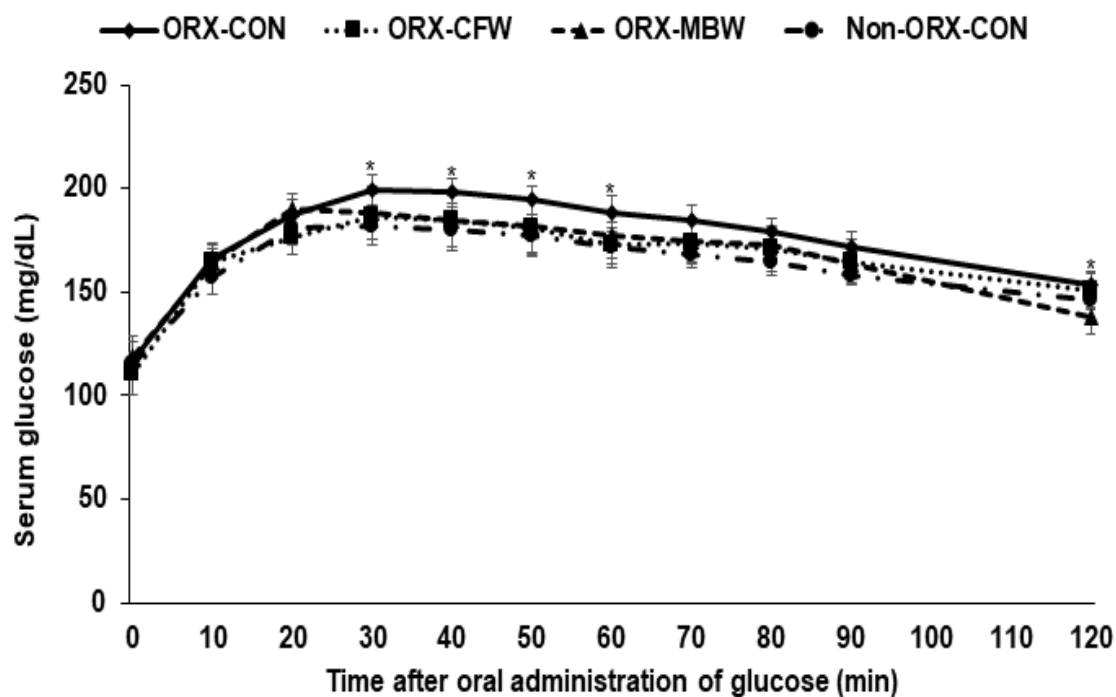

B.

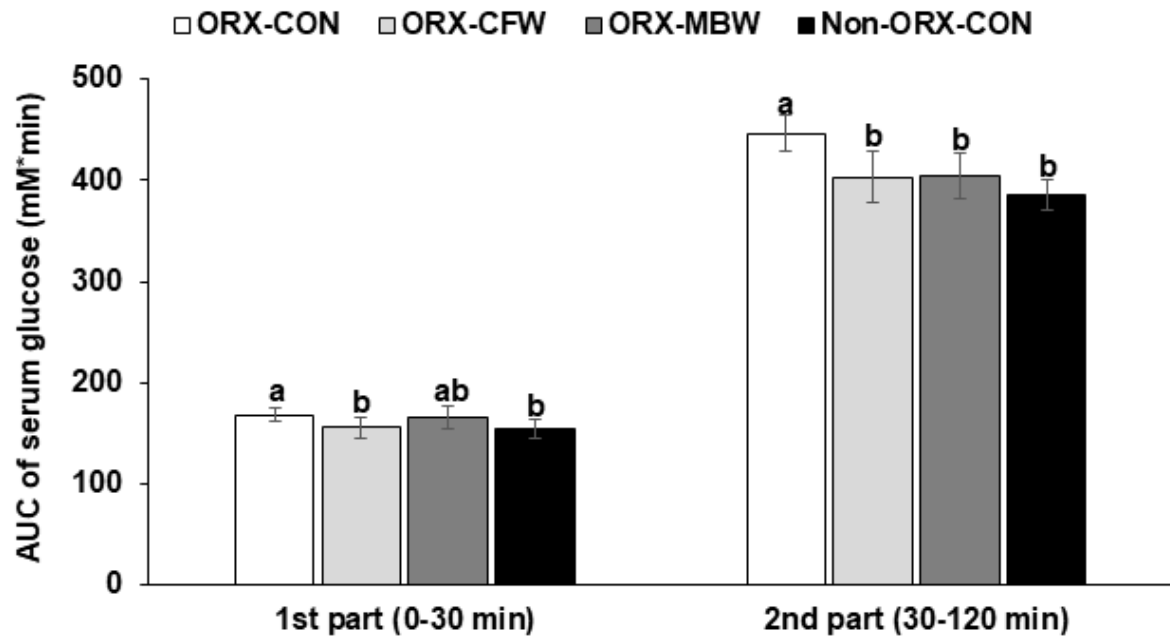

**Figure S2.** Serum glucose levels and area under the curve (AUC) during oral glucose tolerance test at 10th week. (A) Changes of serum glucose levels in 16-h fasted rats after oral challenge of 2 g glucose/kg body weight; (B) Area under the curve (AUC) of serum glucose calculated in the first (0–40 min) and second phases (40–120 min). Each bar or dot and error bar represented the mean  $\pm$  SD,  $n = 10$ . Means without a common alphabet differ at  $P < 0.05$ . ORX-OA-CON, ORX male rats with 43% fat diet with 0.5% dextrin; ORX-OA-CFW, ORX male rats with 43% fat diet with 0.5% CFW; ORX-OA-MBW: ORX male rats with 43% fat diet with 0.5% MBW; Non-ORX-OA-CON, Sham male rats with 43% fat diet with 0.5% dextrin.

A

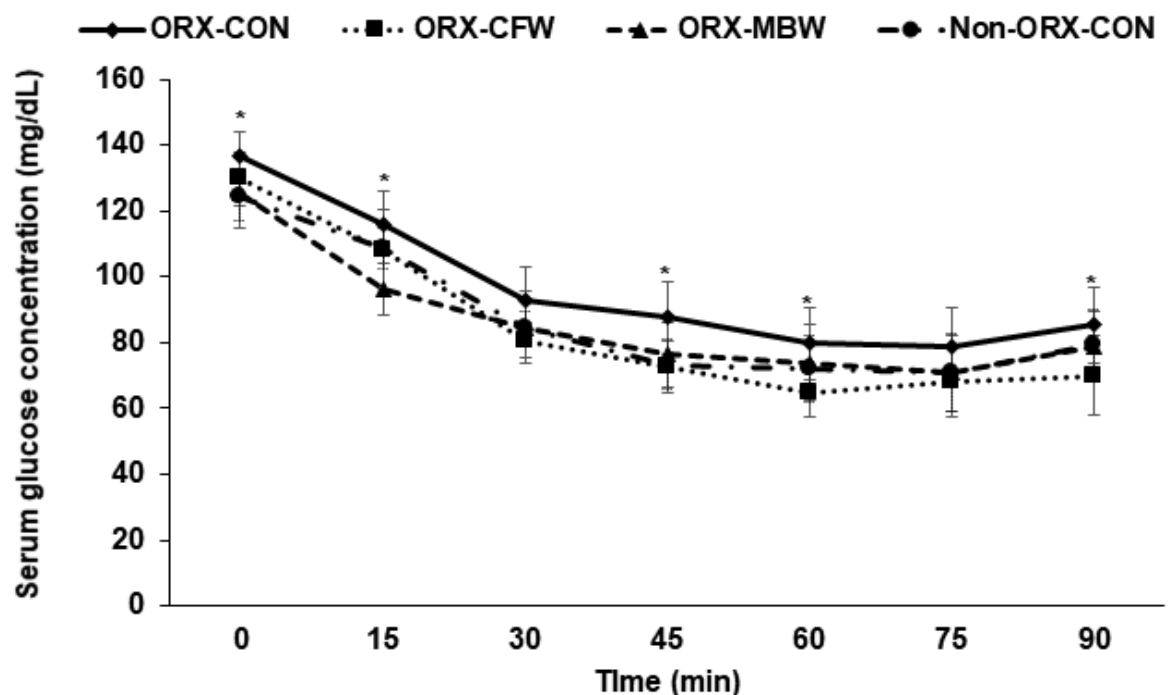

B

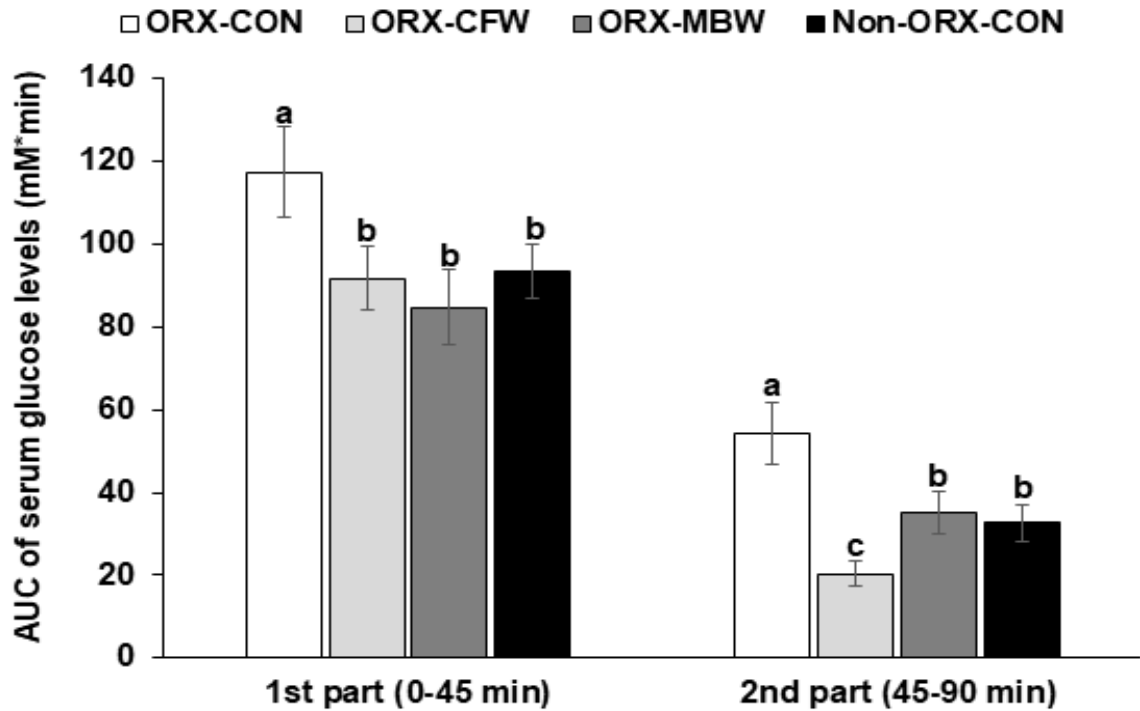

**Figure S3.** Changes of serum glucose levels during insulin tolerance test at 10th week; (A) Changes of serum glucose levels after 1 U insulin/kg body weight into subcutaneous injection after 6h food deprivation; (B) BArea under the curve (AUC) of serum glucose levels calculated in the first (0-30 min) and second phases (30-90 min). Each bar or dot and error bar represented the mean  $\pm$  SD,  $n = 10$ . Means without a common alphabet differ at  $P < 0.05$ . ORX-OA-CON, ORX male rats with 43% fat diet with 0.5% dextrin; ORX-OA-CFW, ORX male rats with 43% fat diet with 0.5% CFW; ORX-OA-MBW: ORX male rats with 43% fat diet with 0.5% MBW; Non-ORX-OA-CON, Sham male rats with 43% fat diet with 0.5% dextrin.
